# Supplementary material for: Macrophage Infiltration Initiates RIP3/MLKL-Dependent Necroptosis in Paclitaxel-Induced Neuropathic Pain
Source: Hindawi journal article supplement (doi:10.1155/2022/1567210), 2022-09-16

A

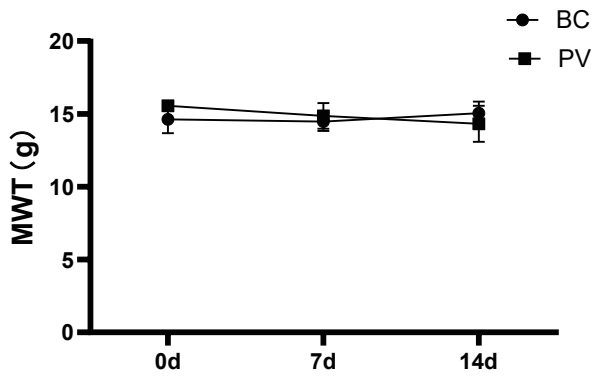

B

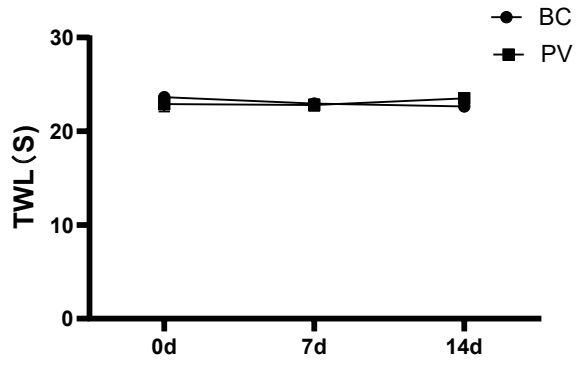

Supplement: f1 [file 1567210.f1.pdf]
